# Supplementary material for: Person-Generated Health Data in Women’s Health: Scoping Review
Source: PubMed Central journal article supplement (PMC11140278; doi:10.2196/53327), 2024-05-16
Supplement: jmir_v26i1e53327_app2.pdf [file jmir_v26i1e53327_app2.pdf]

This multimedia appendix contains the full search strategy used in our scoping review titled “Person-Generated Health Data in Women’s Health”.

**\*Terms added for the additional searches run on November 13 2020 and March 10 2021 are highlighted in grey. These terms were not originally included in the March 2020 searches.\***

---

**Ovid MEDLINE(R) and Epub Ahead of Print, In-Process & Other Non-Indexed Citations and Daily <1946 to March 02, 2020>**

| #  | Searches                                                                                                                                                                                                                                                                                                                                                                         |
|----|----------------------------------------------------------------------------------------------------------------------------------------------------------------------------------------------------------------------------------------------------------------------------------------------------------------------------------------------------------------------------------|
| 1  | medical informatics applications/                                                                                                                                                                                                                                                                                                                                                |
| 2  | mobile applications/                                                                                                                                                                                                                                                                                                                                                             |
| 3  | exp Computers, Handheld/                                                                                                                                                                                                                                                                                                                                                         |
| 4  | exp Cell Phone/                                                                                                                                                                                                                                                                                                                                                                  |
| 5  | Wireless Technology/                                                                                                                                                                                                                                                                                                                                                             |
| 6  | exp Wearable Electronic Devices/                                                                                                                                                                                                                                                                                                                                                 |
| 7  | ((mobile or smart* or phone? or cellular or cellphone? or tablet?) adj4 (App? or application? or software)).kw,tw.                                                                                                                                                                                                                                                               |
| 8  | ((mobile or smart* or tablet? or wireless or hand-held or handheld or portable) adj4 (device? or technolog*)).kw,tw.                                                                                                                                                                                                                                                             |
| 9  | (medical informatics or health informatics or mobile health or mhealth or m-health or electronic health or ehealth or e-health or digital health or smartphone? or smartwatch* or tablet computer? or electronic tablet? or electronic device? or wireless communication? or ipad? or i-pad? or iphone? or i-phone? or android or wearable? or Internet of things or IOT).kf,tw. |
| 10 | or/1-9                                                                                                                                                                                                                                                                                                                                                                           |
| 11 | Monitoring, Physiologic/                                                                                                                                                                                                                                                                                                                                                         |
| 12 | Self Care/                                                                                                                                                                                                                                                                                                                                                                       |
| 13 | Self-management/                                                                                                                                                                                                                                                                                                                                                                 |
| 14 | (("person-generated" or "patient-generated") adj4 data).kw,tw.                                                                                                                                                                                                                                                                                                                   |
| 15 | ("digital biomark*" or track* or monitor* or sensor* or nanosensor? or self-care or self-manag* or self-regulat* or PGHD or ResearchKit or ResearchStack or HealthKit or CareKit or "Google Fit" or "Apple Health").kf,tw.                                                                                                                                                       |
| 16 | or/11-15                                                                                                                                                                                                                                                                                                                                                                         |
| 17 | exp Women's health/                                                                                                                                                                                                                                                                                                                                                              |
| 18 | exp Women/                                                                                                                                                                                                                                                                                                                                                                       |
| 19 | Female/                                                                                                                                                                                                                                                                                                                                                                          |
| 20 | (wom#n or women? or female?).kf,tw.                                                                                                                                                                                                                                                                                                                                              |
| 21 | or/17-20                                                                                                                                                                                                                                                                                                                                                                         |
| 22 | 10 and 16 and 21                                                                                                                                                                                                                                                                                                                                                                 |
| 23 | 22 not (Animals/ not (Animals/ and Humans/))                                                                                                                                                                                                                                                                                                                                     |
| 24 | (comment or editorial or letter).pt.                                                                                                                                                                                                                                                                                                                                             |
| 25 | 23 not 24                                                                                                                                                                                                                                                                                                                                                                        |
| 26 | limit 25 to yr="2015 - 2020"                                                                                                                                                                                                                                                                                                                                                     |

## Embase <1974 to 2020 March 02>

| #  | Searches                                                                                                                                                                                                                                                                                                                                                                            |
|----|-------------------------------------------------------------------------------------------------------------------------------------------------------------------------------------------------------------------------------------------------------------------------------------------------------------------------------------------------------------------------------------|
| 1  | medical informatics/                                                                                                                                                                                                                                                                                                                                                                |
| 2  | mobile application/                                                                                                                                                                                                                                                                                                                                                                 |
| 3  | mobile health application/                                                                                                                                                                                                                                                                                                                                                          |
| 4  | tablet computer/                                                                                                                                                                                                                                                                                                                                                                    |
| 5  | exp wearable computer/                                                                                                                                                                                                                                                                                                                                                              |
| 6  | exp mobile phone/                                                                                                                                                                                                                                                                                                                                                                   |
| 7  | wireless communication/                                                                                                                                                                                                                                                                                                                                                             |
| 8  | electronic device/                                                                                                                                                                                                                                                                                                                                                                  |
| 9  | activity tracker/                                                                                                                                                                                                                                                                                                                                                                   |
| 10 | ((mobile or smart* or phone? or cellular or cellphone? or tablet?) adj4 (App? or application? or software)).ab,kw,ti.                                                                                                                                                                                                                                                               |
| 11 | ((mobile or smart* or tablet? or wireless or hand-held or handheld or portable) adj4 (device? or technolog*)).ab,kw,ti.                                                                                                                                                                                                                                                             |
| 12 | (medical informatics or health informatics or mobile health or mhealth or m-health or electronic health or ehealth or e-health or digital health or smartphone? or smartwatch* or tablet computer? or electronic tablet? or electronic device? or wireless communication? or ipad? or i-pad? or iphone? or i-phone? or android or wearable? or Internet of things or IOT).ab,kw,ti. |
| 13 | or/1-12                                                                                                                                                                                                                                                                                                                                                                             |
| 14 | home monitoring/                                                                                                                                                                                                                                                                                                                                                                    |
| 15 | physiologic monitoring/                                                                                                                                                                                                                                                                                                                                                             |
| 16 | self monitoring/                                                                                                                                                                                                                                                                                                                                                                    |
| 17 | patient monitoring/                                                                                                                                                                                                                                                                                                                                                                 |
| 18 | personal monitoring/                                                                                                                                                                                                                                                                                                                                                                |
| 19 | online monitoring/                                                                                                                                                                                                                                                                                                                                                                  |
| 20 | sensor/                                                                                                                                                                                                                                                                                                                                                                             |
| 21 | electronic sensor/                                                                                                                                                                                                                                                                                                                                                                  |
| 22 | nanosensor/                                                                                                                                                                                                                                                                                                                                                                         |
| 23 | self care/                                                                                                                                                                                                                                                                                                                                                                          |
| 24 | (("person-generated" or "patient-generated") adj4 data).ab,kw,ti.                                                                                                                                                                                                                                                                                                                   |
| 25 | ("digital biomark*" or track* or monitor* or sensor* or nanosensor? or self-care or self-manag* or self-regulat* or PGHD or ResearchKit or ResearchStack or HealthKit or CareKit or "Google Fit" or "Apple Health").ab,kw,ti.                                                                                                                                                       |
| 26 | or/14-25                                                                                                                                                                                                                                                                                                                                                                            |
| 27 | women's health/                                                                                                                                                                                                                                                                                                                                                                     |
| 28 | female/                                                                                                                                                                                                                                                                                                                                                                             |
| 29 | (wom#n or women? or female?).ab,kw,ti.                                                                                                                                                                                                                                                                                                                                              |
| 30 | or/27-29                                                                                                                                                                                                                                                                                                                                                                            |
| 31 | 13 and 26 and 30                                                                                                                                                                                                                                                                                                                                                                    |
| 32 | 31 not (Animals/ not (Animals/ and Humans/))                                                                                                                                                                                                                                                                                                                                        |
| 33 | (conference abstract or conference review or editorial or letter).pt.                                                                                                                                                                                                                                                                                                               |
| 34 | 32 not 33                                                                                                                                                                                                                                                                                                                                                                           |
| 35 | limit 34 to yr="2015 - 2020"                                                                                                                                                                                                                                                                                                                                                        |

## APA PsycInfo

Search completed: March 4, 2020

| #   | Searches                                                                                                                                                                                                                                                                                                                                                                                                                                                                                                                                                                                                                                                                                                                                                                                                                                                                                                                                                                                                                                                                                                                                                                                                         |
|-----|------------------------------------------------------------------------------------------------------------------------------------------------------------------------------------------------------------------------------------------------------------------------------------------------------------------------------------------------------------------------------------------------------------------------------------------------------------------------------------------------------------------------------------------------------------------------------------------------------------------------------------------------------------------------------------------------------------------------------------------------------------------------------------------------------------------------------------------------------------------------------------------------------------------------------------------------------------------------------------------------------------------------------------------------------------------------------------------------------------------------------------------------------------------------------------------------------------------|
| S1  | DE "Mobile Health"                                                                                                                                                                                                                                                                                                                                                                                                                                                                                                                                                                                                                                                                                                                                                                                                                                                                                                                                                                                                                                                                                                                                                                                               |
| S2  | DE "Mobile Applications"                                                                                                                                                                                                                                                                                                                                                                                                                                                                                                                                                                                                                                                                                                                                                                                                                                                                                                                                                                                                                                                                                                                                                                                         |
| S3  | DE "Tablet Computers"                                                                                                                                                                                                                                                                                                                                                                                                                                                                                                                                                                                                                                                                                                                                                                                                                                                                                                                                                                                                                                                                                                                                                                                            |
| S4  | DE "Mobile Phones"                                                                                                                                                                                                                                                                                                                                                                                                                                                                                                                                                                                                                                                                                                                                                                                                                                                                                                                                                                                                                                                                                                                                                                                               |
| S5  | DE "Wireless Technologies"                                                                                                                                                                                                                                                                                                                                                                                                                                                                                                                                                                                                                                                                                                                                                                                                                                                                                                                                                                                                                                                                                                                                                                                       |
| S6  | DE "Mobile Technology"                                                                                                                                                                                                                                                                                                                                                                                                                                                                                                                                                                                                                                                                                                                                                                                                                                                                                                                                                                                                                                                                                                                                                                                           |
| S7  | DE "Mobile Devices"                                                                                                                                                                                                                                                                                                                                                                                                                                                                                                                                                                                                                                                                                                                                                                                                                                                                                                                                                                                                                                                                                                                                                                                              |
| S8  | DE "Wearable Devices"                                                                                                                                                                                                                                                                                                                                                                                                                                                                                                                                                                                                                                                                                                                                                                                                                                                                                                                                                                                                                                                                                                                                                                                            |
| S9  | TI ((mobile OR smart* OR phone# OR cellular OR cellphone# OR tablet#) N3 (App# OR application# OR software)) OR AB ((mobile OR smart* OR phone# OR cellular OR cellphone# OR tablet#) N3 (App# OR application# OR software)) OR KW ((mobile OR smart* OR phone# OR cellular OR cellphone# OR tablet#) N3 (App# OR application# OR software))                                                                                                                                                                                                                                                                                                                                                                                                                                                                                                                                                                                                                                                                                                                                                                                                                                                                     |
| S10 | TI ((mobile OR smart* OR tablet# OR wireless OR hand-held OR handheld OR portable) N3 (device# OR technolog*)) OR AB ( (mobile OR smart* OR tablet# OR wireless OR hand-held OR handheld OR portable) N3 (device# OR technolog*)) OR KW ((mobile OR smart* OR tablet# OR wireless OR hand-held OR handheld OR portable) N3 (device# OR technolog*))                                                                                                                                                                                                                                                                                                                                                                                                                                                                                                                                                                                                                                                                                                                                                                                                                                                              |
| S11 | TI ( "medical informatics" OR "health informatics" OR "mobile health" OR mhealth OR m-health OR "electronic health" OR ehealth OR e-health OR "digital health" OR smartphone# OR smartwatch* OR "tablet computer#" OR "electronic tablet#" OR "electronic device#" OR "wireless communication#" OR ipad# OR i-pad# OR iphone# OR i-phone# OR android OR wearable# OR "internet of things" OR iot ) OR AB ( "medical informatics" OR "health informatics" OR "mobile health" OR mhealth OR m-health OR "electronic health" OR ehealth OR e-health OR "digital health" OR smartphone# OR smartwatch* OR "tablet computer#" OR "electronic tablet#" OR "electronic device#" OR "wireless communication#" OR ipad# OR i-pad# OR iphone# OR i-phone# OR android OR wearable# OR "internet of things" OR iot ) OR KW ( "medical informatics" OR "health informatics" OR "mobile health" OR mhealth OR m-health OR "electronic health" OR ehealth OR e-health OR "digital health" OR smartphone# OR smartwatch* OR "tablet computer#" OR "electronic tablet#" OR "electronic device#" OR "wireless communication#" OR ipad# OR i-pad# OR iphone# OR i-phone# OR android OR wearable# OR "internet of things" OR iot ) ) |
| S12 | S1 OR S2 OR S3 OR S4 OR S5 OR S6 OR S7 OR S8 OR S9 OR S10 OR S11                                                                                                                                                                                                                                                                                                                                                                                                                                                                                                                                                                                                                                                                                                                                                                                                                                                                                                                                                                                                                                                                                                                                                 |
| S13 | DE "Monitoring"                                                                                                                                                                                                                                                                                                                                                                                                                                                                                                                                                                                                                                                                                                                                                                                                                                                                                                                                                                                                                                                                                                                                                                                                  |
| S14 | DE "Self-Monitoring"                                                                                                                                                                                                                                                                                                                                                                                                                                                                                                                                                                                                                                                                                                                                                                                                                                                                                                                                                                                                                                                                                                                                                                                             |
| S15 | DE "Tracking"                                                                                                                                                                                                                                                                                                                                                                                                                                                                                                                                                                                                                                                                                                                                                                                                                                                                                                                                                                                                                                                                                                                                                                                                    |
| S16 | DE "Self-Care"                                                                                                                                                                                                                                                                                                                                                                                                                                                                                                                                                                                                                                                                                                                                                                                                                                                                                                                                                                                                                                                                                                                                                                                                   |
| S17 | DE "Self-Management"                                                                                                                                                                                                                                                                                                                                                                                                                                                                                                                                                                                                                                                                                                                                                                                                                                                                                                                                                                                                                                                                                                                                                                                             |
| S18 | DE "Self-Regulation"                                                                                                                                                                                                                                                                                                                                                                                                                                                                                                                                                                                                                                                                                                                                                                                                                                                                                                                                                                                                                                                                                                                                                                                             |
| S19 | TI (("person-generated" OR "patient-generated") N3 data) OR AB (("person-generated" OR "patient-generated") N3 data) OR KW (("person-generated" OR "patient-generated") N3 data)                                                                                                                                                                                                                                                                                                                                                                                                                                                                                                                                                                                                                                                                                                                                                                                                                                                                                                                                                                                                                                 |
| S20 | TI ("digital biomark*" OR track* OR monitor* OR sensor* OR nanosensor# OR self-care OR self-manag* OR self-regulat* OR PGHD OR ResearchKit OR ResearchStack OR                                                                                                                                                                                                                                                                                                                                                                                                                                                                                                                                                                                                                                                                                                                                                                                                                                                                                                                                                                                                                                                   |

|                                         |                                                                                                                                                                                                                                                                                                                                                                                                                                                                                                                              |
|-----------------------------------------|------------------------------------------------------------------------------------------------------------------------------------------------------------------------------------------------------------------------------------------------------------------------------------------------------------------------------------------------------------------------------------------------------------------------------------------------------------------------------------------------------------------------------|
|                                         | HealthKit OR CareKit OR "Google Fit" OR "Apple Health") OR AB ("digital biomark*" OR track* OR monitor* OR sensor* OR nanosensor# OR self-care OR self-manag* OR self-regulat* OR PGHD OR ResearchKit OR ResearchStack OR HealthKit OR CareKit OR "Google Fit" OR "Apple Health") OR KW ("digital biomark*" OR track* OR monitor* OR sensor* OR nanosensor# OR self-care OR self-manag* OR self-regulat* OR PGHD OR ResearchKit OR ResearchStack OR HealthKit OR CareKit OR "Google Fit" OR "Apple Health")                  |
| S21                                     | S13 OR S14 OR S15 OR S16 OR S17 OR S18 OR S19 OR S20                                                                                                                                                                                                                                                                                                                                                                                                                                                                         |
| S22                                     | DE "Human Females"                                                                                                                                                                                                                                                                                                                                                                                                                                                                                                           |
| S23                                     | TI (wom?n OR women# OR female#) OR AB (wom?n OR women# OR female#) OR KW (wom?n OR women# OR female#)                                                                                                                                                                                                                                                                                                                                                                                                                        |
| S24                                     | S22 OR S23                                                                                                                                                                                                                                                                                                                                                                                                                                                                                                                   |
| S25                                     | DE "Health" OR DE "Adolescent Health" OR DE "Health Anxiety" OR DE "Health Status" OR DE "Global Health" OR DE "Health Disparities" OR DE "Health Literacy" OR DE "Health Outcomes" OR DE "Health Promotion" OR DE "Holistic Health" OR DE "Mental Health" OR DE "Occupational Health" OR DE "Oral Health" OR DE "Physical Health" OR DE "Population Health" OR DE "Public Health" OR DE "Reproductive Health" OR DE "Sexual Health" OR DE "Well Being"                                                                      |
| S26                                     | TI health OR AB health OR KW health                                                                                                                                                                                                                                                                                                                                                                                                                                                                                          |
| S27                                     | S25 OR S26                                                                                                                                                                                                                                                                                                                                                                                                                                                                                                                   |
| S28                                     | S12 AND S21 AND S24 AND S27                                                                                                                                                                                                                                                                                                                                                                                                                                                                                                  |
| S29                                     | S28 NOT (DE "Animals" OR DE "Species Differences" OR DE "Animal Limb" OR DE "Animal Offspring" OR DE "Female Animals" OR DE "Infants (Animal)" OR DE "Invertebrates" OR DE "Male Animals" OR DE "Pets" OR DE "Service Animals" OR DE "Vertebrates") NOT ((DE "Animals" OR DE "Species Differences" OR DE "Animal Limb" OR DE "Animal Offspring" OR DE "Female Animals" OR DE "Infants (Animal)" OR DE "Invertebrates" OR DE "Male Animals" OR DE "Pets" OR DE "Service Animals" OR DE "Vertebrates") AND DE "Human Females") |
| S30                                     | S29 NOT (ZZ "editorial" or ZZ "letter" or ZZ "comment/reply")                                                                                                                                                                                                                                                                                                                                                                                                                                                                |
| Limited by: Publication Year: 2015-2020 |                                                                                                                                                                                                                                                                                                                                                                                                                                                                                                                              |

## CINAHL Complete

Search completed: March 6, 2020

| #  | Searches                                                                                                                                                                                                                         |
|----|----------------------------------------------------------------------------------------------------------------------------------------------------------------------------------------------------------------------------------|
| S1 | MH "Health Informatics"                                                                                                                                                                                                          |
| S2 | MH "Medical Informatics"                                                                                                                                                                                                         |
| S3 | MH "Mobile Applications"                                                                                                                                                                                                         |
| S4 | MH "Computers, Portable+"                                                                                                                                                                                                        |
| S5 | MH "Cellular Phone"                                                                                                                                                                                                              |
| S6 | MH "Wireless Communications"                                                                                                                                                                                                     |
| S7 | MH "Fitness Trackers"                                                                                                                                                                                                            |
| S8 | TI ((mobile OR smart* OR phone# OR cellular OR cellphone# OR tablet#) N3 (App# OR Application# OR Software)) OR AB ((mobile OR smart* OR phone# OR cellular OR cellphone# OR tablet#) N3 (App# OR Application# OR Software))     |
| S9 | TI ((mobile OR smart* OR tablet# OR wireless OR hand-held OR handheld OR portable) N3 (device# OR technolog*)) OR AB ((mobile OR smart* OR tablet# OR wireless OR hand-held OR handheld OR portable) N3 (device# OR technolog*)) |

|                                         |                                                                                                                                                                                                                                                                                                                                                                                                                                                                                                                                                                                                                                                                                                                                                                                                       |
|-----------------------------------------|-------------------------------------------------------------------------------------------------------------------------------------------------------------------------------------------------------------------------------------------------------------------------------------------------------------------------------------------------------------------------------------------------------------------------------------------------------------------------------------------------------------------------------------------------------------------------------------------------------------------------------------------------------------------------------------------------------------------------------------------------------------------------------------------------------|
| S10                                     | TI ( "medical informatics" OR "health informatics" OR "mobile health" OR mhealth OR m-health OR "electronic health" OR ehealth OR e-health OR "digital health" OR smartphone# OR smartwatch* OR "tablet computer#" OR "electronic tablet#" OR "electronic device#" OR "wireless communication#" OR ipad# OR i-pad# OR iphone# OR i-phone# OR android OR wearable# OR "internet of things" OR iot) OR AB ("medical informatics" OR "health informatics" OR "mobile health" OR mhealth OR m-health OR "electronic health" OR ehealth OR e-health OR "digital health" OR smartphone# OR smartwatch* OR "tablet computer#" OR "electronic tablet#" OR "electronic device#" OR "wireless communication#" OR ipad# OR i-pad# OR iphone# OR i-phone# OR android OR wearable# OR "internet of things" OR iot) |
| S11                                     | S1 OR S2 OR S3 OR S4 OR S5 OR S6 OR S7 OR S8 OR S9 OR S10                                                                                                                                                                                                                                                                                                                                                                                                                                                                                                                                                                                                                                                                                                                                             |
| S12                                     | MH "Monitoring, Physiologic"                                                                                                                                                                                                                                                                                                                                                                                                                                                                                                                                                                                                                                                                                                                                                                          |
| S13                                     | MH "Wearable Sensors+"                                                                                                                                                                                                                                                                                                                                                                                                                                                                                                                                                                                                                                                                                                                                                                                |
| S14                                     | MH "Self Care"                                                                                                                                                                                                                                                                                                                                                                                                                                                                                                                                                                                                                                                                                                                                                                                        |
| S15                                     | MH "Self-Management"                                                                                                                                                                                                                                                                                                                                                                                                                                                                                                                                                                                                                                                                                                                                                                                  |
| S16                                     | MH "Blood Glucose Self-Monitoring"                                                                                                                                                                                                                                                                                                                                                                                                                                                                                                                                                                                                                                                                                                                                                                    |
| S17                                     | MH "Self Regulation"                                                                                                                                                                                                                                                                                                                                                                                                                                                                                                                                                                                                                                                                                                                                                                                  |
| S18                                     | TI ( ("person-generated" OR "patient-generated") N3 data ) OR AB ( ("person-generated" OR "patient-generated") N3 data )                                                                                                                                                                                                                                                                                                                                                                                                                                                                                                                                                                                                                                                                              |
| S19                                     | TI ("digital biomark*" OR track* OR monitor* OR sensor* OR nanosensor# OR self-care OR self-manag* OR self-regulat* OR PGHD OR ResearchKit OR ResearchStack OR HealthKit OR CareKit OR "Google Fit" OR "Apple Health") OR AB ("digital biomark*" OR track* OR monitor* OR sensor* OR nanosensor# OR self-care OR self-manag* OR self-regulat* OR PGHD OR ResearchKit OR ResearchStack OR HealthKit OR CareKit OR "Google Fit" OR "Apple Health")                                                                                                                                                                                                                                                                                                                                                      |
| S20                                     | S12 OR S13 OR S14 OR S15 OR S16 OR S17 OR S18 OR S19                                                                                                                                                                                                                                                                                                                                                                                                                                                                                                                                                                                                                                                                                                                                                  |
| S21                                     | MH "Women's Health"                                                                                                                                                                                                                                                                                                                                                                                                                                                                                                                                                                                                                                                                                                                                                                                   |
| S22                                     | MH "Women+"                                                                                                                                                                                                                                                                                                                                                                                                                                                                                                                                                                                                                                                                                                                                                                                           |
| S23                                     | MH "Female"                                                                                                                                                                                                                                                                                                                                                                                                                                                                                                                                                                                                                                                                                                                                                                                           |
| S24                                     | TI ( wom?n OR women# OR female# ) OR AB ( wom?n OR women# OR female# )                                                                                                                                                                                                                                                                                                                                                                                                                                                                                                                                                                                                                                                                                                                                |
| S25                                     | S21 OR S22 OR S23 OR S24                                                                                                                                                                                                                                                                                                                                                                                                                                                                                                                                                                                                                                                                                                                                                                              |
| S26                                     | S11 AND S20 AND S25                                                                                                                                                                                                                                                                                                                                                                                                                                                                                                                                                                                                                                                                                                                                                                                   |
| S27                                     | S26 NOT ( MH "Animals+" NOT (MH "Animals+" AND MH "Human") )                                                                                                                                                                                                                                                                                                                                                                                                                                                                                                                                                                                                                                                                                                                                          |
| S28                                     | S27 NOT ( PT commentary OR editorial OR letter OR "letter to the editor" )                                                                                                                                                                                                                                                                                                                                                                                                                                                                                                                                                                                                                                                                                                                            |
| Limited by: Publication Year: 2015-2020 |                                                                                                                                                                                                                                                                                                                                                                                                                                                                                                                                                                                                                                                                                                                                                                                                       |

## Web of Science Core Collection

Search completed: March 3, 2020

| #  | Searches                                                                                                                                                                                                                                                                                                                                                                                                    |
|----|-------------------------------------------------------------------------------------------------------------------------------------------------------------------------------------------------------------------------------------------------------------------------------------------------------------------------------------------------------------------------------------------------------------|
| #1 | TS =(“medical informatics” or “health informatics” or “mobile health” or mhealth or m-health or “electronic health” or ehealth or e-health or “digital health” OR smartphone\$ or smartwatch* or “tablet computer\$” or “electronic tablet\$” or “electronic device\$” or “wireless communication\$” or ipad\$ or i-pad\$ or iphone\$ or i-phone\$ or android or wearable\$ or “internet of things” or iot) |
| #2 | TS =((mobile OR smart* OR phone\$ OR cellular OR cellphone\$ OR tablet\$) near/3 (app\$ OR application OR software))                                                                                                                                                                                                                                                                                        |

|                                                                                                                                                            |                                                                                                                                                                                                                         |
|------------------------------------------------------------------------------------------------------------------------------------------------------------|-------------------------------------------------------------------------------------------------------------------------------------------------------------------------------------------------------------------------|
| #3                                                                                                                                                         | TS =((mobile OR smart* OR tablet\$ OR wireless OR hand-held OR handheld OR portable) near/3 (device\$ OR technolog*))                                                                                                   |
| #4                                                                                                                                                         | #1 OR #2 OR #3                                                                                                                                                                                                          |
| #5                                                                                                                                                         | TS=("digital biomark*" OR track* OR monitor* OR sensor* OR nanosensor\$ OR self-care OR self-manag* OR self-regulat* OR PGHD OR ResearchKit OR ResearchStack OR HealthKit OR CareKit OR "Google Fit" OR "Apple Health") |
| #6                                                                                                                                                         | TS=(("person-generated" OR "patient-generated") near/3 data)                                                                                                                                                            |
| #7                                                                                                                                                         | #5 OR #6                                                                                                                                                                                                                |
| #8                                                                                                                                                         | TS = (Wom?n OR women\$ OR female\$)                                                                                                                                                                                     |
| #9                                                                                                                                                         | TS = health                                                                                                                                                                                                             |
| #10                                                                                                                                                        | #4 AND #7 AND #8 AND #9                                                                                                                                                                                                 |
| <b>Refined By:</b> [excluding] <b>DOCUMENT TYPES:</b> (EDITORIAL MATERIAL)<br>AND <b>PUBLICATION YEARS:</b> (2020 OR 2019 OR 2018 OR 2017 OR 2016 OR 2015) |                                                                                                                                                                                                                         |
