# Supplementary material for: Person-Generated Health Data in Women’s Health: Scoping Review
Source: PubMed Central journal article supplement (PMC11140278; doi:10.2196/53327), 2024-05-16
Supplement: jmir_v26i1e53327_app4.pdf [file jmir_v26i1e53327_app4.pdf]

**Multimedia Appendix 4: Metrics that were collected through digital health tools**

|                                                                                                                        |
|------------------------------------------------------------------------------------------------------------------------|
| <b>Personal info and functions</b>                                                                                     |
| Demographics, medical history, or user profile                                                                         |
| Location (GPS)                                                                                                         |
| Location (self-reported)                                                                                               |
| Time zone change                                                                                                       |
| Goal setting function                                                                                                  |
| Uploading photos/videos, including: baby bump photos, baby photos, ultrasound images, photos of food, photos of wounds |
| Facial recognition                                                                                                     |
| Calendar (appointments, events, prescriptions)                                                                         |
| Prescription refill request                                                                                            |
| Free text/notes/diary/voice recording                                                                                  |
| Baby sound recorder                                                                                                    |
| Episodic audio recording – to detect sound of environment                                                              |
| Audio recording function for doctor’s visit                                                                            |
| Interactive voice messaging system                                                                                     |
| Discussion board/online forum/social networks/direct messaging                                                         |
| Message health care provider or schedule medical appointment                                                           |
| Store health care provider contact information                                                                         |
| Ask the app specific questions                                                                                         |
| Text the app for help/advice                                                                                           |
| <b>Mental health, psychosocial measures, and pain-related</b>                                                          |
| Mental well-being, mood tracker, or psychological status                                                               |
| Happiness during pregnancy                                                                                             |
| Worry                                                                                                                  |

|                                            |
|--------------------------------------------|
| Energy level/fatigue                       |
| Enjoyment                                  |
| Anxiety                                    |
| Depression                                 |
| Mood                                       |
| Affect                                     |
| Quality of Life                            |
| Health-related Quality of Life             |
| Met/unmet needs                            |
| Stress                                     |
| Self worth                                 |
| Self esteem                                |
| Social support                             |
| Cognitive function                         |
| Physical ability                           |
| Fear of cancer recurrence                  |
| Self regulation (EMA*)                     |
| Experiences of racism/microaggressions     |
| Pain/pain severity                         |
| Pain fear/avoidance                        |
| Pain catastrophizing                       |
| Pain acceptance                            |
| Pain self management                       |
| Pain with intercourse                      |
| Location on body where pain is experienced |
| Quality of recovery                        |
| Prepartum depression                       |
| Postpartum depression                      |
| Satisfaction with care                     |
| Self efficacy                              |
| Tracking mindfulness practice              |
| Support                                    |

|                                                                  |
|------------------------------------------------------------------|
| <b>Anthropometric and general body-related</b>                   |
| Posture (EMA*)                                                   |
| Self-reported barriers to reaching weight loss goals             |
| Body mass index (BMI)                                            |
| Weight/weight gain                                               |
| Waist circumference                                              |
| Shin circumference                                               |
| Height                                                           |
| <b>Physical activity, cardiovascular, or respiratory-related</b> |
| Training load                                                    |
| Muscle soreness                                                  |
| Step count                                                       |
| Step cadence                                                     |
| Stride length                                                    |
| Aerobic steps                                                    |
| Distance travelled                                               |
| Running speed                                                    |
| Jump height                                                      |
| Floors climbed/elevation                                         |
| Grip strength / pressure                                         |
| Grip reaction time                                               |
| Grip endurance                                                   |
| Training load                                                    |
| Muscle soreness                                                  |
| Balance/strength                                                 |
| Reasons for not exercising/not meeting physical activity goals   |
| Sedentary behaviour/time sitting                                 |
| Physical activity/active minutes                                 |
| Perceived physical exertion                                      |
| Intensity of physical activity                                   |
| Calories expended/metabolism                                     |
| Metabolic equivalent rate (MET)                                  |

|                                                         |
|---------------------------------------------------------|
| Blood pressure reading                                  |
| Radial artery pulse wave signal                         |
| Lung function/obstruction (forced expiratory volume)    |
| Respiratory rate                                        |
| Heart rate/heart rate variability                       |
| VO2                                                     |
| Cardiac activity monitor                                |
| Pulse pressure                                          |
| Skin perfusion                                          |
| Blood oxygen saturation (oximeter)                      |
| Near body ambient temperature                           |
| Body temperature                                        |
| Wrist skin temperature                                  |
| Sweat measurements (electrodermal activity, volume)     |
| Sweat rate                                              |
| Sweat gland activation                                  |
| Skin conductance                                        |
| Sweat conductivity                                      |
| ECG                                                     |
| <b>Food, diet, and other consumption-related</b>        |
| Calorie counting                                        |
| Diet, food diary (eating/drinking habits), or nutrition |
| Reasons for not meeting dietary goals                   |
| Food preferences                                        |
| Food budget                                             |
| Intake of vitamins and minerals (calcium, vitamin D)    |
| Cravings                                                |
| Appetite                                                |
| Loss of control eating tracking                         |
| Degree of hunger before meal                            |
| Planned/unplanned meals                                 |
| Alcohol consumption                                     |
| Caffeine consumption                                    |

|                                                                                     |
|-------------------------------------------------------------------------------------|
| Blood alcohol level (breathalyzer)                                                  |
| Cost savings calculator for quitting smoking                                        |
| Smoking "quit" date                                                                 |
| Smoking behaviour/tracking                                                          |
| Number of cigarettes smoked                                                         |
| Smoking cravings                                                                    |
| Smoking withdrawal symptoms                                                         |
| <b>Pregnancy and postpartum-related</b>                                             |
| Trimester of pregnancy                                                              |
| Whether it is a first pregnancy                                                     |
|                                                                                     |
| Pregnancy due date/milestones for fetal development tracking (eg, gestational week) |
| Preeclampsia symptoms                                                               |
| Protein changes in urine/proteinuria                                                |
| Prenatal vitamins taken (folic acid)                                                |
| Prenatal ultrasound                                                                 |
| Fundal height                                                                       |
| Estimated fetal weight                                                              |
| Pregnancy or birthing discomforts/symptoms                                          |
| Pregnancy outcome                                                                   |
| Neonatal outcomes                                                                   |
| Cervical dilation                                                                   |
| Uterine contractions                                                                |
| Fetal kicks/movement                                                                |
| Fetal ECG                                                                           |
| CTG monitoring                                                                      |
| Fetal heart rate/heart rate variation                                               |
| Fetal anthropometrics                                                               |
| Embryotic fluid level                                                               |
| Fetal hypoxia                                                                       |
| Baby's sex                                                                          |
| Birth records                                                                       |

|                                                                    |
|--------------------------------------------------------------------|
| Vaccination record for newborn/child                               |
| Infant mood                                                        |
| Postpartum events/symptoms                                         |
| Postpartum depression                                              |
| Number of wet/dirty diapers or bowel movements                     |
| Breastfeeding challenges, annoyances                               |
| Breastfeeding patterns/tracking                                    |
| Which breast during feed                                           |
| Latching/breastfeeding position                                    |
| Breast milk expression time tracker/pumping record                 |
| Bottle feeding tracker                                             |
| Volume of breast milk expressed                                    |
| Breastfeeding locations                                            |
| Sleeping patterns of newborn                                       |
| Proximity to baby                                                  |
| Baby's medical history                                             |
| Baby's anthropometric measurements                                 |
| Baby's mood                                                        |
| Baby/infant milestones                                             |
| Baby's medication                                                  |
| Provision and duration of kangaroo care                            |
| <b>Disease/condition and cancer-related</b>                        |
| Asthma symptoms                                                    |
| Asthma medications                                                 |
| UVR exposure                                                       |
| Sun protection                                                     |
| Duration of activities done in clear daylight (vitamin D exposure) |
| Blood glucose levels                                               |
| HbA1c levels                                                       |
| Ketonuria analysis results                                         |
| Proteinuria analysis results                                       |

|                                                                      |
|----------------------------------------------------------------------|
| Current medications/adherence to medications and treatment regimens  |
| Reasons for not taking medication                                    |
| Insulin dosage                                                       |
| Metformin dosage                                                     |
| Illness events                                                       |
| Perioperative symptoms                                               |
| Incontinence                                                         |
| Tracking pelvic floor exercise completion                            |
| Pelvic floor muscles – maximum voluntary contraction, relaxation     |
| Urinary incontinence, number of daily voids                          |
| Urinary incontinence, daily leaks (symptom severity)                 |
| Urinary incontinence, number of pad changes                          |
| Urinary incontinence – Quality of Life                               |
| Breast cancer detection - sensor                                     |
| Cancer diagnosis                                                     |
| Arm mobility (following breast cancer)                               |
| Tracking upper arm and shoulder exercises for upper limb dysfunction |
| Arm and shoulder flexibility                                         |
| Breast cancer symptom tracker                                        |
| Side effects/symptoms of cancer treatment                            |
| Severity of cancer treatment side effects/symptoms                   |
| Interference of ADLs due to severity of cancer symptoms              |
| Post surgical symptoms and severity                                  |
| Lymphedema symptoms/severity                                         |
| Completion of daily lymphedema exercises                             |
| Osteoarthritis pain intensity                                        |
| Perceived osteoarthritis pain improvement                            |
| Pain interference with activities of daily living                    |
| Tracking wear time of osteoarthritis gloves                          |

|                                                                                         |
|-----------------------------------------------------------------------------------------|
| Tracking exercises for osteoporosis                                                     |
| Symptoms of hypertension (headache, epigastric pain, nausea, vomiting, visual symptoms) |
| Breast abnormalities                                                                    |
| <b>Menstruation, fertility, and sexual health-related</b>                               |
| Basal body temperature                                                                  |
| Photo of urine dipstick                                                                 |
| Ovulation/LH/urine test results                                                         |
| Saliva sample microfluidic sensor                                                       |
| STI symptoms                                                                            |
| Previous STI treatments                                                                 |
| Cervical fluid during the menstrual cycle                                               |
| Cervical characteristics (open/closed, high/low)                                        |
| Vaginal sensations (wetness)                                                            |
| Fever occurrence                                                                        |
| Shower before sleep                                                                     |
| Menstrual cycle tracker                                                                 |
| Age of menarche                                                                         |
| Menstrual cycle symptoms                                                                |
| Spotting between periods                                                                |
| Period blood volume estimation                                                          |
| Menstrual clots                                                                         |
| Menstrual breakthrough bleeding/flooding                                                |
| Intercourse/sexual activity                                                             |
| Sexual health                                                                           |
| Sex drive                                                                               |
| Sexuality                                                                               |
| Pain medication taken                                                                   |
| Number of days of sick leave taken                                                      |
| Self care activities                                                                    |
| Tracking acupressure sessions                                                           |
| Pain during menstrual cycle                                                             |
| Adverse reactions to acupressure                                                        |

|                                                                                                           |
|-----------------------------------------------------------------------------------------------------------|
| Emotions and mood tracking during menstrual cycle                                                         |
| Hormonal contraceptive use                                                                                |
| Description of contraceptive use                                                                          |
| Pregnancy test result                                                                                     |
| Menopausal symptoms                                                                                       |
| <b>Other</b>                                                                                              |
| Lab results                                                                                               |
| Bowel movements/description                                                                               |
| Current activity/type of activity (EMA*)                                                                  |
| Symptoms following vaccination                                                                            |
| Reasons for not completing the challenge                                                                  |
| Sleep quality/measurements/satisfaction                                                                   |
| Sleep interruptions/sleeping irregularities                                                               |
| Sleep stage                                                                                               |
| Sleep time/duration                                                                                       |
| Assessment of daily functional activity                                                                   |
| Environmental sensors (temperature, humidity, air quality, air pressure, noise, quality of potable water) |
| Self reported environmental exposures                                                                     |
| Humidity                                                                                                  |
| Air quality                                                                                               |
| Noise                                                                                                     |
| Quality of their potable water                                                                            |
| Seizures                                                                                                  |
| Current level of safety                                                                                   |
| Current level of fear in the relationship                                                                 |
| How healthy she believes that her relationship is                                                         |
| Danger assessment                                                                                         |

\* EMA = ecological momentary assessment
